# Supplementary material for: Large contribution of soil N 2 O emission to the global warming potential of a large-scale oil palm plantation despite changing from conventional to reduced management practices
Source: Copernicus journal article supplement (doi:10.5194/bg-2023-102), 2023-07-24
Supplement: Supplementary file 1 [file bg-2023-102-supplement.pdf]

Supplementary material for:

## **Large contribution of soil N<sub>2</sub>O emission to the global warming potential of a large-scale oil palm plantation despite changing from conventional to reduced management practices**

5 Guantao Chen<sup>1</sup>, Edzo Veldkamp<sup>1</sup>, Muhammad Damris<sup>2</sup>, Bambang Irawan<sup>3</sup>, Aiyen Tjoa<sup>4</sup>, Marife D. Corre<sup>1</sup>

<sup>1</sup>Soil Science of Tropical and Subtropical Ecosystems, Faculty of Forest Sciences and Forest Ecology, University of Goettingen, Göttingen 37077, Germany

10 <sup>2</sup>Faculty of Science and Technology, University of Jambi, Jl. Raya Jambi-Ma. Bulian km. 15, Mendalo Darat, Muaro, Jambi 36361, Indonesia

<sup>3</sup>Forestry Faculty, University of Jambi, Campus Pinang Masak Mendalo, Jambi 36361, Indonesia

<sup>4</sup>Faculty of Agriculture, Tadulako University, Jl. Soekarno Hatta, km 09 Tondo, Palu 94118, Indonesia

*Correspondence to:* Guantao Chen (gchen1@gwdg.de)

### 15 **Contents of this file**

Fig. S1 – S5

Table S1 – S2

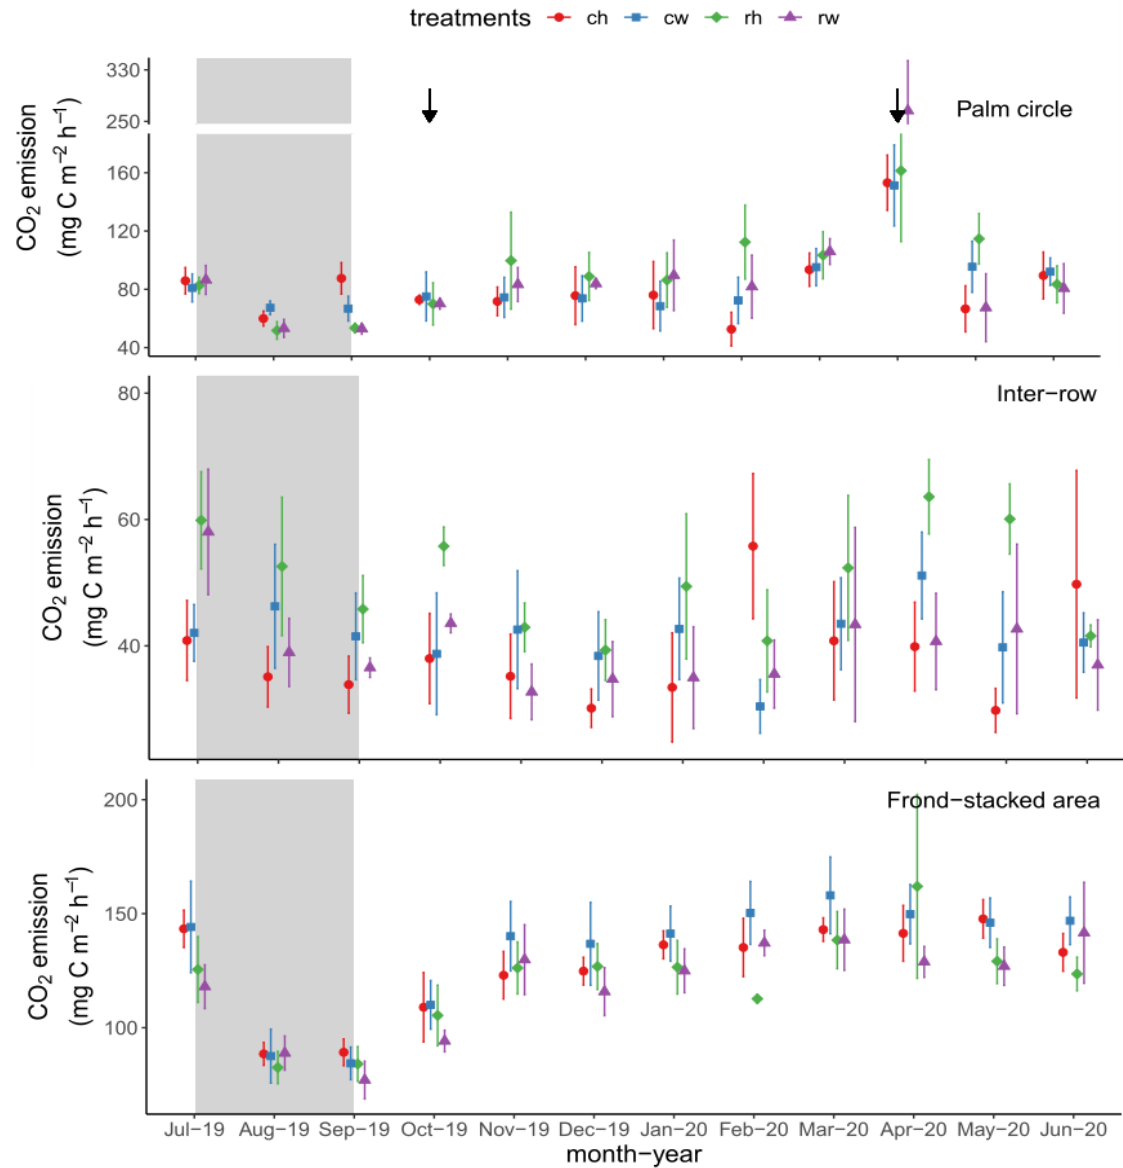

**Fig. S1** Soil CO<sub>2</sub> emissions (mean ± SE,  $n = 4$  plots) from different fertilization and weeding treatments in an  $\geq 18$ -year old, large-scale oil palm plantation, Jambi, Indonesia, measured monthly from July 2019 to June 2020. Gray shadings mark the dry season (precipitation  $\leq 80$  mm month<sup>-1</sup>) and black arrows indicate fertilizer applications on the palm circle. Note the different y-axis ranges for the three management zones. ch: conventional fertilization – herbicide weeding, cw: conventional fertilization – mechanical weeding, rh: reduced fertilization – herbicide weeding, rw: reduced fertilization – mechanical weeding

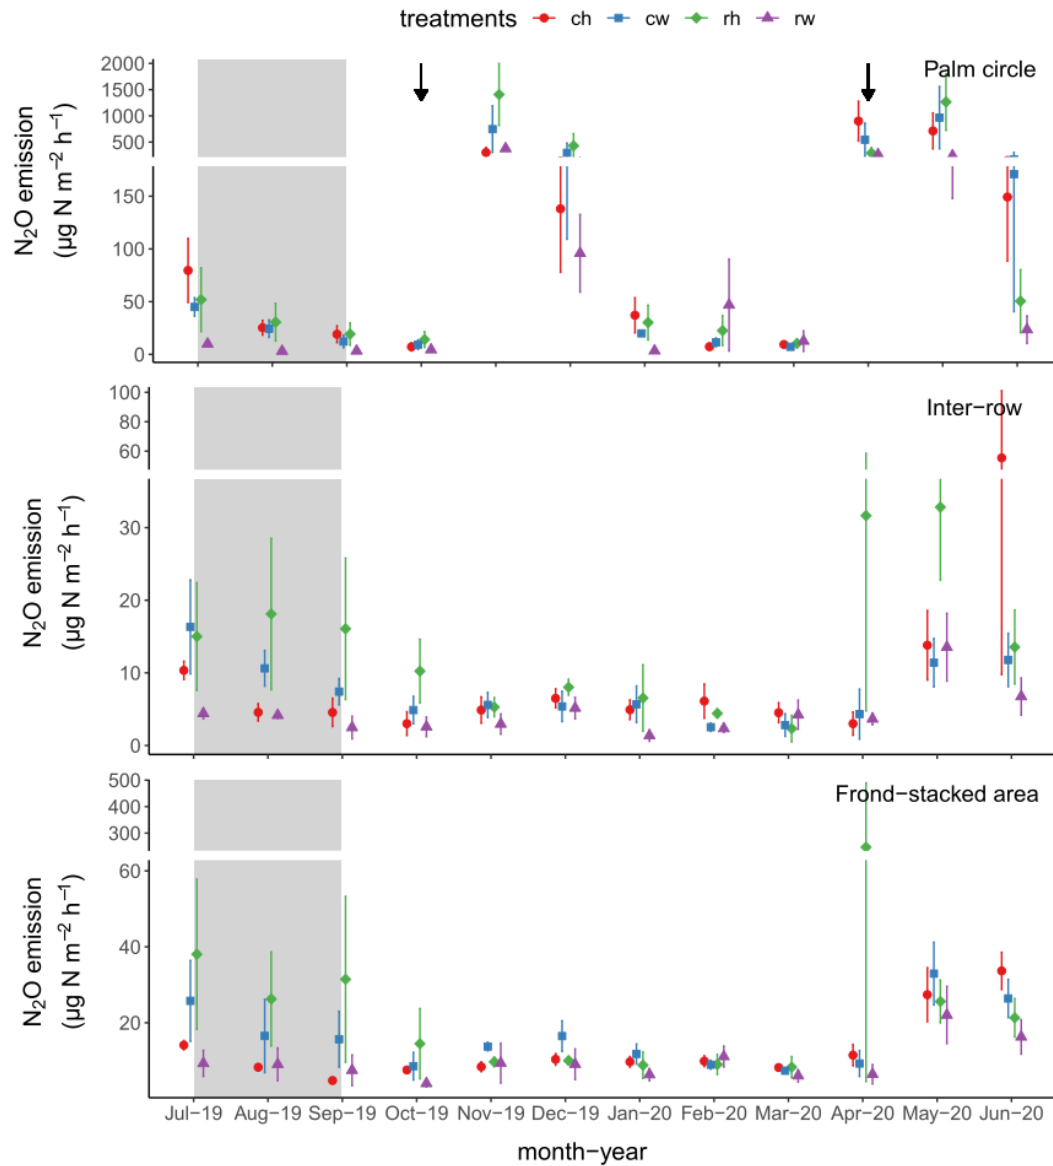

25

**Fig. S2** Soil N<sub>2</sub>O emissions (mean ± SE, *n* = 4 plots) from different fertilization and weeding treatments in an ≥ 18-year old, large-scale oil palm plantation, Jambi, Indonesia, measured monthly from July 2019 to June 2020. Gray shadings mark the dry season (precipitation ≤ 80 mm month<sup>-1</sup>) and black arrows indicate fertilizer applications on the palm circle. Note the different y-axis ranges for the three management zones. ch: conventional fertilization – herbicide weeding, cw: conventional fertilization – mechanical weeding, rh: reduced fertilization – herbicide weeding, rw: reduced fertilization – mechanical weeding

30

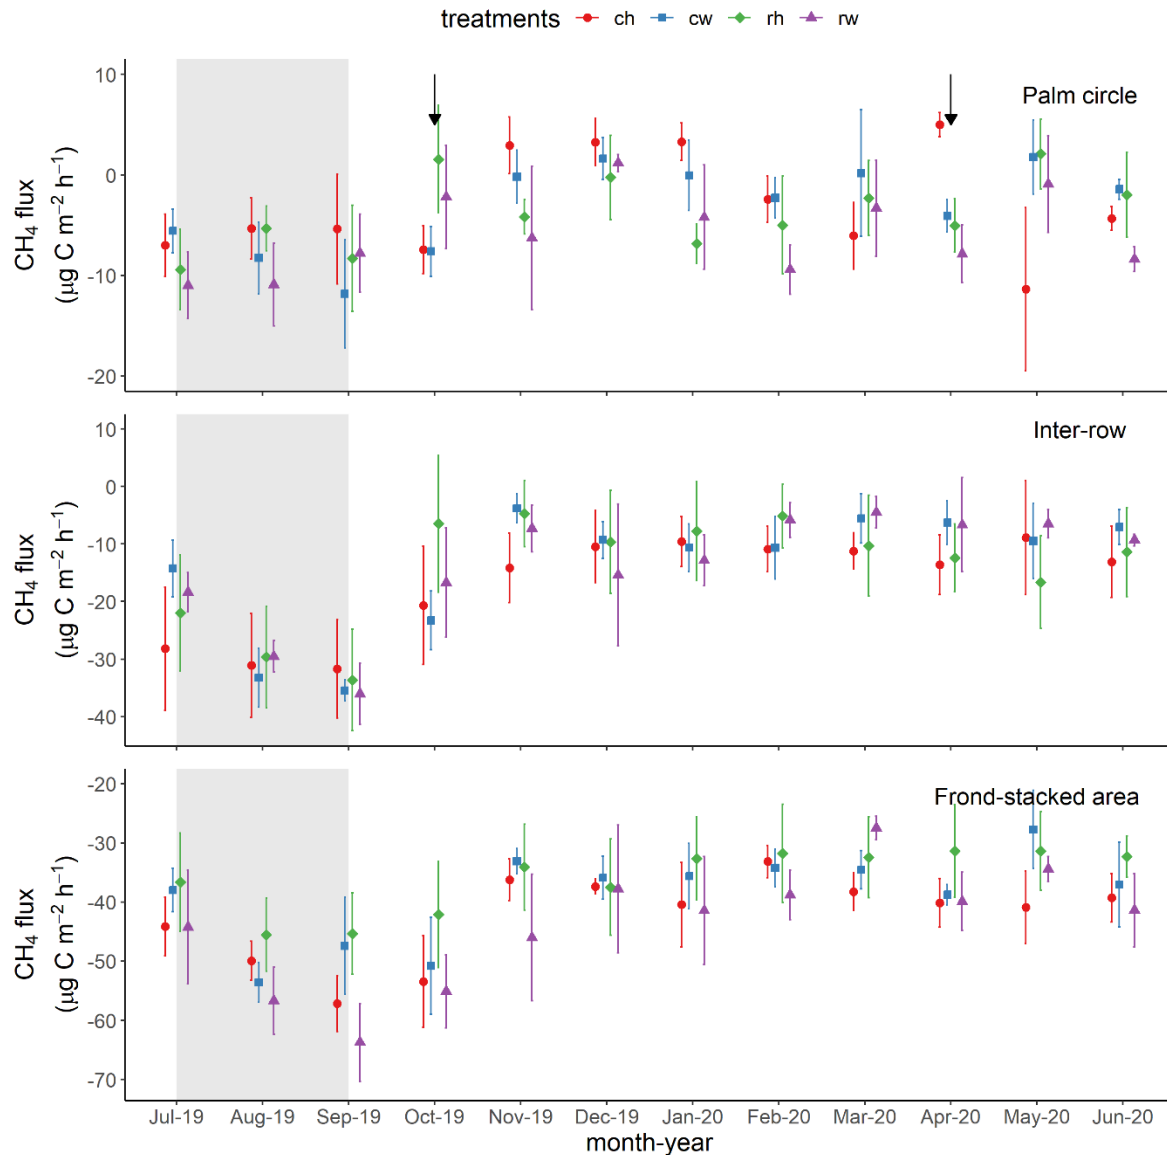

**Fig. S3** Soil CH<sub>4</sub> fluxes (mean ± SE,  $n = 4$  plots) from different fertilization and weeding treatments in an  $\geq 18$ -year old, large-scale oil palm plantation, Jambi, Indonesia, measured monthly from July 2019 to June 2020. Gray shadings mark the dry season (precipitation  $\leq 80$  mm month<sup>-1</sup>) and black arrows indicate fertilizer applications on the palm circle. Note the different y-axis ranges for the three management zones. ch: conventional fertilization – herbicide weeding, cw: conventional fertilization – mechanical weeding, rh: reduced fertilization – herbicide weeding, rw: reduced fertilization – mechanical weeding

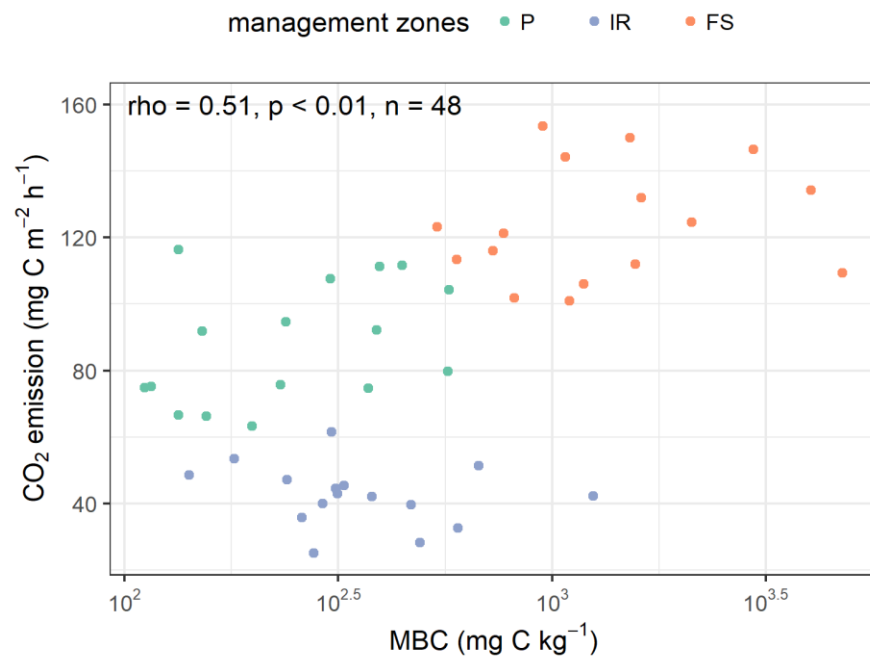

40 **Fig. S4** Spearman rank correlation between soil CO<sub>2</sub> emissions and microbial biomass carbon (MBC). Each data point for soil CO<sub>2</sub> emissions was the average of 12-monthly measurements and MBC was measured once in 2018, as reported by Formaglio et al. (2021). P – palm circle, IR – inter-row, FS – frond-stacked area

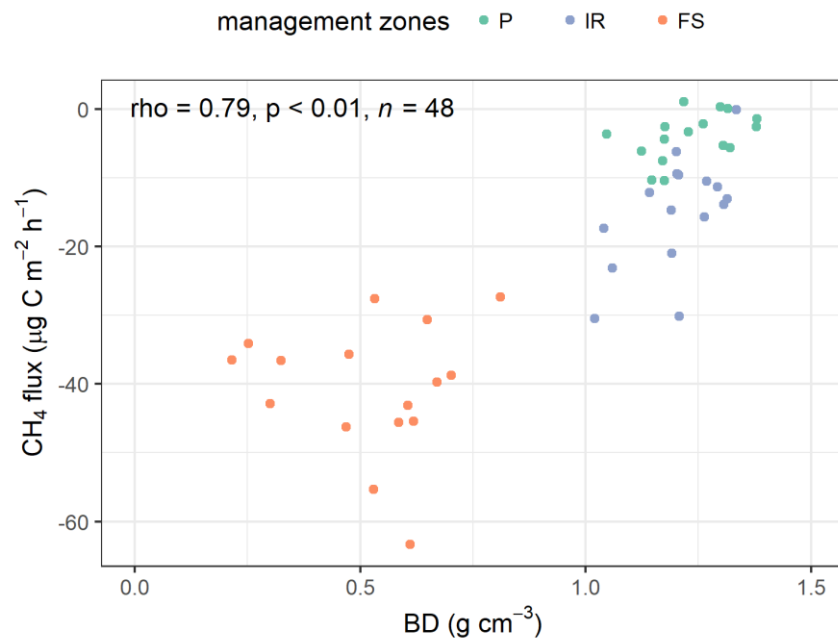

45 **Fig. S5** Spearman rank correlation between soil CH<sub>4</sub> fluxes and soil bulk density (BD). Each data point for soil CH<sub>4</sub> fluxes was the average of 12-monthly measurements and BD was measured once in 2018 (Formaglio et al. 2021). P – palm circle, IR – inter-row, FS – frond-stacked area

**Table S1** Soil biochemical and physical characteristics (means  $\pm$  SE,  $n = 16$  plots) in 0–50 cm depth determined in 2018 and soil texture in the 50–150 cm depth determined in 2021, reported for each management zone in an  $\geq 18$ -year old, large-scale oil palm plantation, Jambi, Indonesia

| Characteristics                                 | Palm circle        | Inter-row          | FronD-stacked area |
|-------------------------------------------------|--------------------|--------------------|--------------------|
| Soil organic C (kg C m <sup>-2</sup> )          | 6.2 $\pm$ 0.6 b    | 6.4 $\pm$ 0.2 b    | 9.1 $\pm$ 0.8 a    |
| Total N (g N m <sup>-2</sup> )                  | 402 $\pm$ 31 b     | 426 $\pm$ 15 ab    | 571 $\pm$ 39 a     |
| ECEC (mmol <sub>charge</sub> kg <sup>-1</sup> ) | 35 $\pm$ 2 a       | 18 $\pm$ 1 b       | 28 $\pm$ 2 a       |
| pH (1:4 soil-to-H <sub>2</sub> O)               | 5.05 $\pm$ 0.08 a  | 4.81 $\pm$ 0.05 b  | 5.00 $\pm$ 0.08 ab |
| Bulk density (g cm <sup>-3</sup> )              | 1.37 $\pm$ 0.01 a  | 1.36 $\pm$ 0.01 a  | 0.89 $\pm$ 0.01 b  |
| Clay (%)                                        | 23.30 $\pm$ 1.31 a | 23.60 $\pm$ 1.00 a | 25.47 $\pm$ 1.37 a |
| Silt (%)                                        | 7.80 $\pm$ 1.19 a  | 7.73 $\pm$ 1.23 a  | 6.47 $\pm$ 1.21 a  |
| Sand (%)                                        | 68.90 $\pm$ 1.52 a | 68.67 $\pm$ 1.35 a | 68.07 $\pm$ 1.97 a |

50 ECEC: effective cation exchange capacity. For each parameter, different letters indicate significant differences among management zones (one-way ANOVA with Tukey HSD at  $P \leq 0.05$ ). Except for soil texture, soil characteristics were reported by Formaglio et al. (2020)

**Table S2** Cumulative fruit yield from 2017–2020 (means  $\pm$  SE,  $n = 4$  plots) in different fertilization and weeding treatments in an  $\geq 18$ -year old, large-scale oil palm plantation, Jambi, Indonesia

| Treatments | Cumulative yield (Mg ha <sup>-1</sup> ) |                  |                  |                   |
|------------|-----------------------------------------|------------------|------------------|-------------------|
|            | 2017                                    | 2018             | 2019             | 2020              |
| ch         | 26.64 $\pm$ 1.91                        | 57.55 $\pm$ 2.74 | 83.41 $\pm$ 3.63 | 114.60 $\pm$ 4.26 |
| cw         | 31.24 $\pm$ 1.12                        | 66.51 $\pm$ 1.57 | 96.75 $\pm$ 3.55 | 130.37 $\pm$ 4.45 |
| rh         | 28.18 $\pm$ 2.35                        | 56.31 $\pm$ 4.86 | 86.59 $\pm$ 5.21 | 116.01 $\pm$ 6.20 |
| rw         | 29.38 $\pm$ 4.69                        | 60.62 $\pm$ 5.35 | 90.94 $\pm$ 5.25 | 118.50 $\pm$ 5.92 |

There are no significant differences among treatments for each column ( $2^2$  factorial ANOVA; fertilization:  $P = 0.35$ – $0.96$ ; weeding control:  $P = 0.07$ – $0.32$ ; interaction:  $P = 0.23$ – $0.57$ ). ch: conventional fertilization – herbicide weeding, cw: conventional fertilization – mechanical weeding, rh: reduced fertilization – herbicide weeding, rw: reduced fertilization – mechanical weeding. Fruit yield was reported by Iddris et al. (2023)

55



## References

- 60 Formaglio, G., Veldkamp, E., Duan, X., Tjoa, A., and Corre, M. D.: Herbicide weed control increases nutrient leaching compared to mechanical weeding in a large-scale oil palm plantation, *Biogeosciences*, 17, 5243–5262, <https://doi.org/10.5194/bg-17-5243-2020>, 2020.
- Formaglio, G., Veldkamp, E., Damris, M., Tjoa, A., and Corre, M. D.: Mulching with pruned fronds promotes the internal soil N cycling and soil fertility in a large-scale oil palm plantation, *Biogeochemistry*, 154, 63–80, <https://doi.org/10.1007/s10533-021-00798-4>, 2021.
- 65 Iddris, N. A., Formaglio, G., Paul, C., von Groß, V., Chen, G., Angulo-Rubiano, A., Berkelmann, D., Brambach, F., Darras, K. F. A., Krashevskaya, V., Potapov, A., Wenzel, A., Irawan, B., Damris, M., Daniel, R., Grass, I., Kreft, H., Scheu, S., Tschardtke, T., Tjoa, A., Veldkamp, E., and Corre, M. D.: Mechanical weeding enhances ecosystem multifunctionality and profit in industrial oil palm, *Nat Sustain.* <https://doi.org/10.1038/s41893-023-01076-x>, 2023.
